# Supplementary material for: Using qualitative and community-based engagement approaches to gain access and to develop a culturally appropriate STI prevention intervention for foreign female entertainment workers in Singapore
Source: Springer Nature journal article supplement (doi:10.1186/s12992-018-0358-5), 2018-04-16
Supplement: MOESM1 [file 15703526]

**Additional file 1: Table S1 Results of the estimated foreign female entertainment worker (FEW) population sizes using the census enumeration technique**

| Site                                                                | Joo Chiat Road,<br>Eastern Singapore<br>(Vietnamese FEWs) | Beach Road,<br>Southern Singapore<br>(Thai FEWs) |                             |                 |
|---------------------------------------------------------------------|-----------------------------------------------------------|--------------------------------------------------|-----------------------------|-----------------|
| <b>Low (conservative) estimate accounting for duplication count</b> |                                                           |                                                  |                             |                 |
| Stratum                                                             | Small- and medium sized EEs                               | Large sized EEs                                  | Small- and medium sized EEs | Large sized EEs |
| Total number of EEs in each stratum                                 | 13                                                        | 7                                                | 18                          | 6               |
| Average number of FEWs in each stratum                              | 23                                                        | 11                                               | 4                           | 43              |
| Total number of FEWs in each stratum                                | 299                                                       | 77                                               | 72                          | 258             |
| Total number of FEWs in the site                                    | 376                                                       |                                                  | 330                         |                 |
| <b>High estimate without accounting for duplication count</b>       |                                                           |                                                  |                             |                 |
| Stratum                                                             | Small- and medium sized EEs                               | Large size EEs                                   | Small- and medium sized EEs | Large size EEs  |
| Total number of EEs in each stratum                                 | 13                                                        | 7                                                | 18                          | 6               |
| Average number of FEWs in each stratum                              | 48                                                        | 13                                               | 6                           | 54              |
| Total number of FEWs in each stratum                                | 624                                                       | 91                                               | 108                         | 324             |
| Total number of FEWs in the site                                    | 715                                                       |                                                  | 432                         |                 |
